# Supplementary material
Source: ML conference proceedings conference paper supplement (https://openaccess.thecvf.com/content/WACV2023/html/Xuan_Dissecting_Deep_Metric_WACV_2023_paper.html)
Supplement: Supplementary file 1 [file Xuan_Dissecting_Deep_Metric_WACV_2023_supplemental.pdf]

## Appendix of Dissecting Deep Metric Learning Losses for Image-Text Retrieval

### 1. Validation on Gradient Method

Table 1 shows the results from origin VSE++ and VSE $\infty$  work trained with triplet loss and the results implemented with the equivalent gradient methods with combination of  $T^{con}$  and  $P^{con}$  as mentioned in Section 4.2.

| Method                   | Image $\rightarrow$ Text |                |                | Text $\rightarrow$ Image |                |                |
|--------------------------|--------------------------|----------------|----------------|--------------------------|----------------|----------------|
|                          | R@1                      | R@5            | R@10           | R@1                      | R@5            | R@10           |
| VSE++(R152,FT)           | 41.3                     | -              | 81.2           | 30.3                     | -              | 72.4           |
| VSE++(R152,FT) ours      | 41.0 $\pm$ 0.3           | 70.4 $\pm$ 0.4 | 81.3 $\pm$ 0.3 | 30.2 $\pm$ 0.1           | 60.1 $\pm$ 0.1 | 72.5 $\pm$ 0.1 |
| VSE $\infty$ (BUTD)      | 58.3                     | 85.3           | -              | 42.4                     | 72.7           | -              |
| VSE $\infty$ (BUTD) ours | 58.3 $\pm$ 0.7           | 85.5 $\pm$ 0.4 | 92.6 $\pm$ 0.0 | 43.1 $\pm$ 0.0           | 73.3 $\pm$ 0.1 | 83.4 $\pm$ 0.2 |
| VSE $\infty$ (WSL)       | 66.4                     | 89.3           | -              | 51.6                     | 79.3           | -              |
| VSE $\infty$ (WSL) ours  | 66.2 $\pm$ 0.2           | 89.5 $\pm$ 0.2 | 94.8 $\pm$ 0.3 | 51.6 $\pm$ 0.3           | 79.3 $\pm$ 0.2 | 87.6 $\pm$ 0.2 |

Table 1. Results verification of the model trained with triplet loss function backward vs the model trained with gradient backward on three VSE methods

### 2. Flickr 30K test result

Similar Experiment on Flickr 30K as mentioned in Section 4.3.

| VSE++ (ResNet152, fine-tuned)        |                          |                |                |                          |                |                |
|--------------------------------------|--------------------------|----------------|----------------|--------------------------|----------------|----------------|
|                                      | Image $\rightarrow$ Text |                |                | Text $\rightarrow$ Image |                |                |
|                                      | $T^{con}$                | $T^{nca}$      | $T^{cir}$      | $T^{con}$                | $T^{nca}$      | $T^{cir}$      |
| $P^{con}$                            | 55.0 $\pm$ 0.5           | 55.2 $\pm$ 0.3 | 54.7 $\pm$ 0.9 | 40.9 $\pm$ 0.7           | 39.6 $\pm$ 0.1 | 40.3 $\pm$ 0.2 |
| $P^{lin}$                            | 55.4 $\pm$ 0.7           | 54.9 $\pm$ 1.1 | 55.6 $\pm$ 0.9 | 41.2 $\pm$ 0.5           | 40.9 $\pm$ 0.1 | 41.4 $\pm$ 0.4 |
| $P^{sig}$                            | 56.8 $\pm$ 0.4           | 57.0 $\pm$ 0.5 | 56.3 $\pm$ 0.6 | 41.5 $\pm$ 0.2           | 42.4 $\pm$ 0.5 | 42.1 $\pm$ 0.4 |
| $P^{lin-ms}$                         | 54.9 $\pm$ 0.6           | 56.2 $\pm$ 0.7 | 55.7 $\pm$ 0.5 | 40.6 $\pm$ 0.8           | 41.1 $\pm$ 0.4 | 41.0 $\pm$ 0.3 |
| $P^{sig-ms}$                         | 53.8 $\pm$ 0.7           | 56.4 $\pm$ 1.3 | 55.7 $\pm$ 1.1 | 40.3 $\pm$ 0.4           | 41.1 $\pm$ 0.2 | 40.6 $\pm$ 0.2 |
| VSE++ (ViT-base-patch16, fine-tuned) |                          |                |                |                          |                |                |
| $P^{con}$                            | 67.3 $\pm$ 0.9           | 67.1 $\pm$ 0.3 | 68.0 $\pm$ 0.6 | 52.8 $\pm$ 0.2           | 53.6 $\pm$ 0.4 | 53.3 $\pm$ 0.3 |
| $P^{lin}$                            | 67.4 $\pm$ 0.6           | 68.1 $\pm$ 0.1 | 68.1 $\pm$ 0.4 | 52.8 $\pm$ 0.3           | 53.4 $\pm$ 0.2 | 53.5 $\pm$ 0.4 |
| $P^{sig}$                            | 68.9 $\pm$ 0.2           | 68.4 $\pm$ 0.5 | 68.9 $\pm$ 0.2 | 53.6 $\pm$ 0.1           | 54.6 $\pm$ 0.2 | 54.2 $\pm$ 0.2 |
| $P^{lin-ms}$                         | 68.9 $\pm$ 0.8           | 68.4 $\pm$ 0.6 | 69.1 $\pm$ 1.0 | 53.1 $\pm$ 0.2           | 53.6 $\pm$ 0.4 | 53.4 $\pm$ 0.2 |
| $P^{sig-ms}$                         | 68.8 $\pm$ 0.0           | 70.5 $\pm$ 1.4 | 70.1 $\pm$ 1.6 | 53.1 $\pm$ 0.4           | 54.8 $\pm$ 0.2 | 54.4 $\pm$ 0.3 |

Table 2. Result of Image  $\rightarrow$  Text and Text  $\rightarrow$  Image Recall@1 on Flickr 30K test with different gradient combinations on two steps VSE++ training with ResNet152.

| VSE $\infty$ (BUTD) |                          |                |                |                          |                |                |
|---------------------|--------------------------|----------------|----------------|--------------------------|----------------|----------------|
|                     | Image $\rightarrow$ Text |                |                | Text $\rightarrow$ Image |                |                |
|                     | $T^{con}$                | $T^{nca}$      | $T^{cir}$      | $T^{con}$                | $T^{nca}$      | $T^{cir}$      |
| $P^{con}$           | 81.1 $\pm$ 0.6           | 81.8 $\pm$ 0.8 | 81.8 $\pm$ 0.9 | 62.1 $\pm$ 0.5           | 62.3 $\pm$ 0.8 | 62.2 $\pm$ 0.7 |
| $P^{lin}$           | 80.5 $\pm$ 0.5           | 80.9 $\pm$ 0.7 | 80.3 $\pm$ 0.7 | 62.2 $\pm$ 0.5           | 62.8 $\pm$ 0.2 | 62.3 $\pm$ 0.8 |
| $P^{sig}$           | 80.2 $\pm$ 0.7           | 81.5 $\pm$ 0.7 | 80.7 $\pm$ 1.1 | 62.2 $\pm$ 1.6           | 62.9 $\pm$ 0.8 | 62.8 $\pm$ 0.4 |
| $P^{lin-ms}$        | 80.6 $\pm$ 0.6           | 80.9 $\pm$ 0.9 | 81.7 $\pm$ 1.3 | 62.3 $\pm$ 0.4           | 62.3 $\pm$ 0.6 | 62.5 $\pm$ 0.9 |
| $P^{sig-ms}$        | 80.5 $\pm$ 0.6           | 81.9 $\pm$ 0.8 | 82.3 $\pm$ 0.9 | 63.2 $\pm$ 0.6           | 63.6 $\pm$ 0.7 | 64.0 $\pm$ 0.6 |
| VSE $\infty$ (WSL)  |                          |                |                |                          |                |                |
| $P^{con}$           | 87.9 $\pm$ 1.1           | 89.4 $\pm$ 1.3 | 88.4 $\pm$ 0.6 | 74.0 $\pm$ 0.4           | 74.5 $\pm$ 0.6 | 74.0 $\pm$ 0.2 |
| $P^{lin}$           | 88.0 $\pm$ 0.1           | 88.8 $\pm$ 0.4 | 89.0 $\pm$ 0.6 | 74.1 $\pm$ 0.7           | 74.8 $\pm$ 0.6 | 74.5 $\pm$ 0.7 |
| $P^{sig}$           | 88.5 $\pm$ 0.7           | 88.7 $\pm$ 0.9 | 89.7 $\pm$ 0.4 | 74.8 $\pm$ 0.7           | 75.4 $\pm$ 0.2 | 75.2 $\pm$ 0.2 |
| $P^{lin-ms}$        | 88.0 $\pm$ 0.6           | 89.5 $\pm$ 0.7 | 89.6 $\pm$ 0.8 | 74.6 $\pm$ 0.7           | 75.6 $\pm$ 0.7 | 75.1 $\pm$ 0.4 |
| $P^{sig-ms}$        | 89.4 $\pm$ 0.8           | 89.6 $\pm$ 0.3 | 90.6 $\pm$ 0.8 | 75.9 $\pm$ 0.6           | 76.0 $\pm$ 0.3 | 76.7 $\pm$ 0.2 |

Table 3. Result of Image  $\rightarrow$  Text and Text  $\rightarrow$  Image Recall@1 Flickr 30K test with different gradient combinations on VSE $\infty$ (BUTD) and VSE $\infty$ (WSL).
